# Supplementary material for: Gradual and contingent evolutionary emergence of leaf mimicry in butterfly wing patterns
Source: PubMed Central journal article supplement (PMC4261531; doi:10.1186/s12862-014-0229-5), 2014-11-25
Supplement: 12862_2014_229_MOESM1_ESM.pdf [file 12862_2014_229_MOESM1_ESM.pdf]

# Gradual and contingent evolutionary emergence of leaf mimicry in butterfly wing patterns

**Takao K Suzuki<sup>1\*</sup>, Shuichiro Tomita<sup>1</sup>, Hideki Sezutsu<sup>1</sup>**

<sup>1</sup> Transgenic Silkworm Research Unit, Genetically Modified Organism Research Center, National Institute of Agrobiological Sciences

1-2 Oowashi, Tsukuba, Ibaraki 305-8634 JAPAN

\*Corresponding author

TKS: [homaresuzuki@gmail.com](mailto:homaresuzuki@gmail.com)

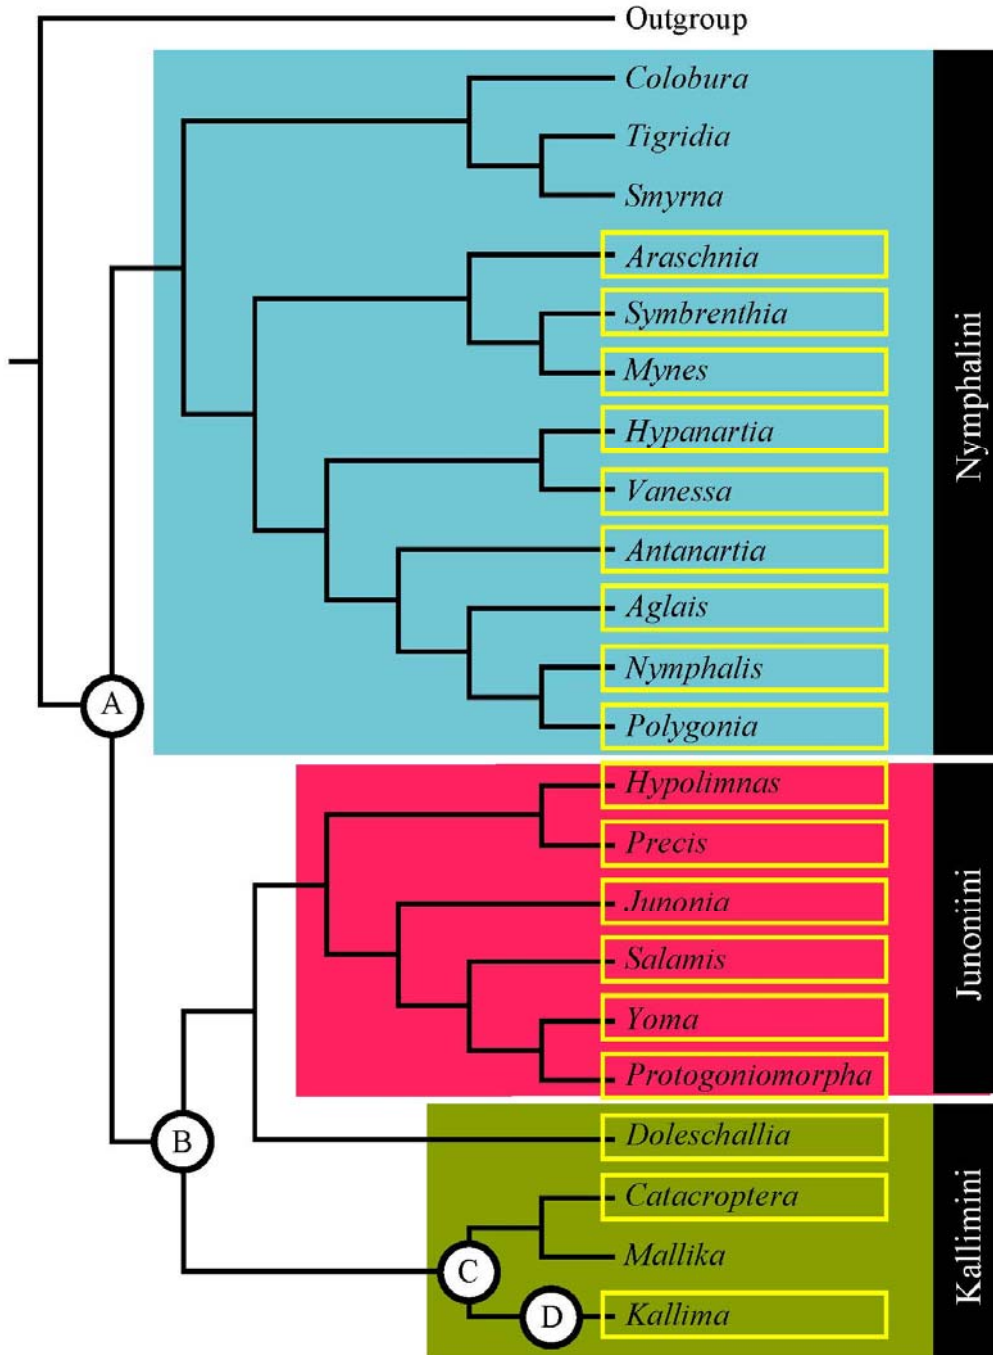

**Supplementary Figure S1. Phylogenetic relationship among genera of *Kallima*, *Junoniini*, and**

*Nymphalini*. The phylogenetic relationship among all the genera included in the higher taxon is shown by Wahlberg [34–36]. The genera used in this study are indicated by yellow-colored squares.

Ancestral character states were reconstructed on the nodes of the phylogeny (A–D).

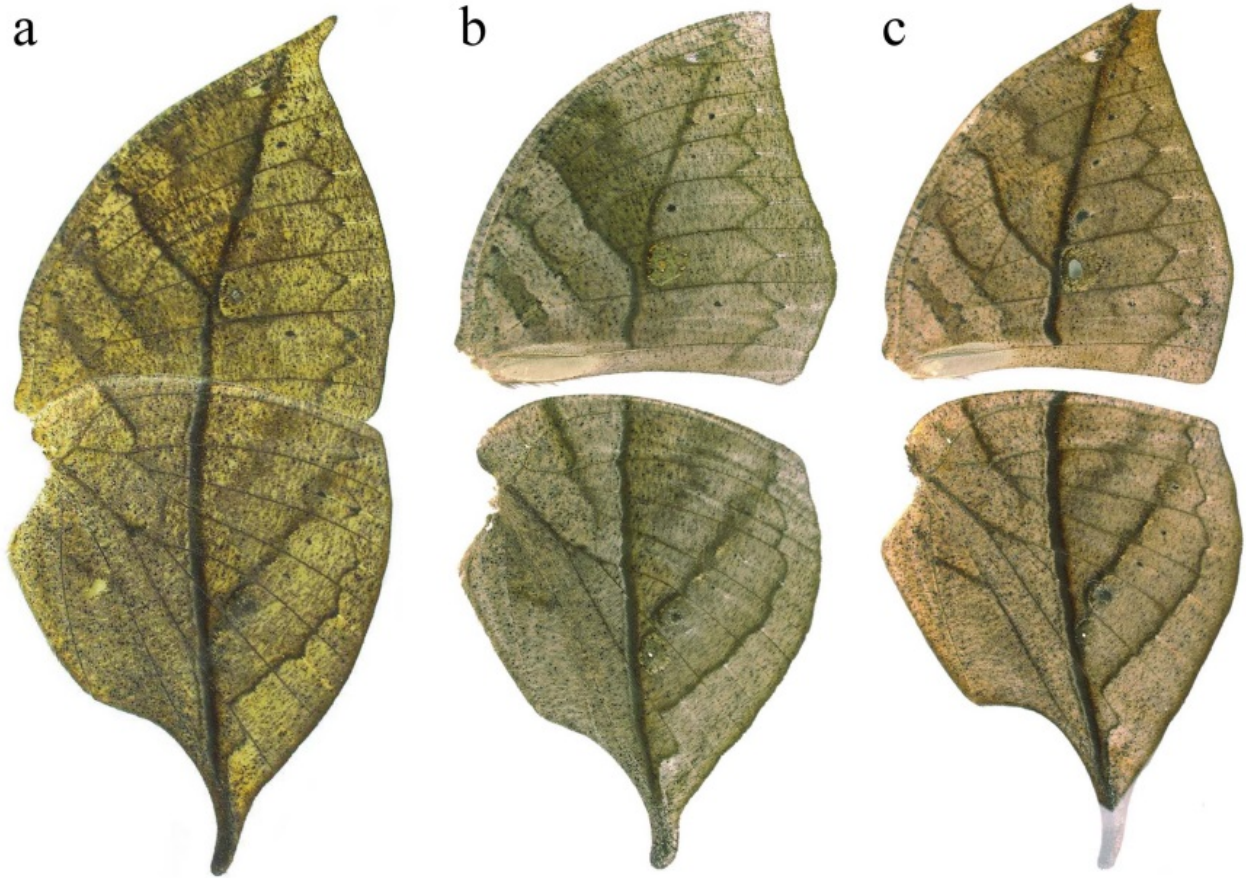

**Supplementary Figure S2. Comparison of leaf wing patterns among three species of the genus**

**Kallima.** The ventral fore and hind wings of three species of *Kallima* are shown. These wing patterns, but not the pigmentation, appear to be almost identical. (a) *Kallima inachus*, (b) *Kallima paralekta*, (c) and *Kallima alompra*.



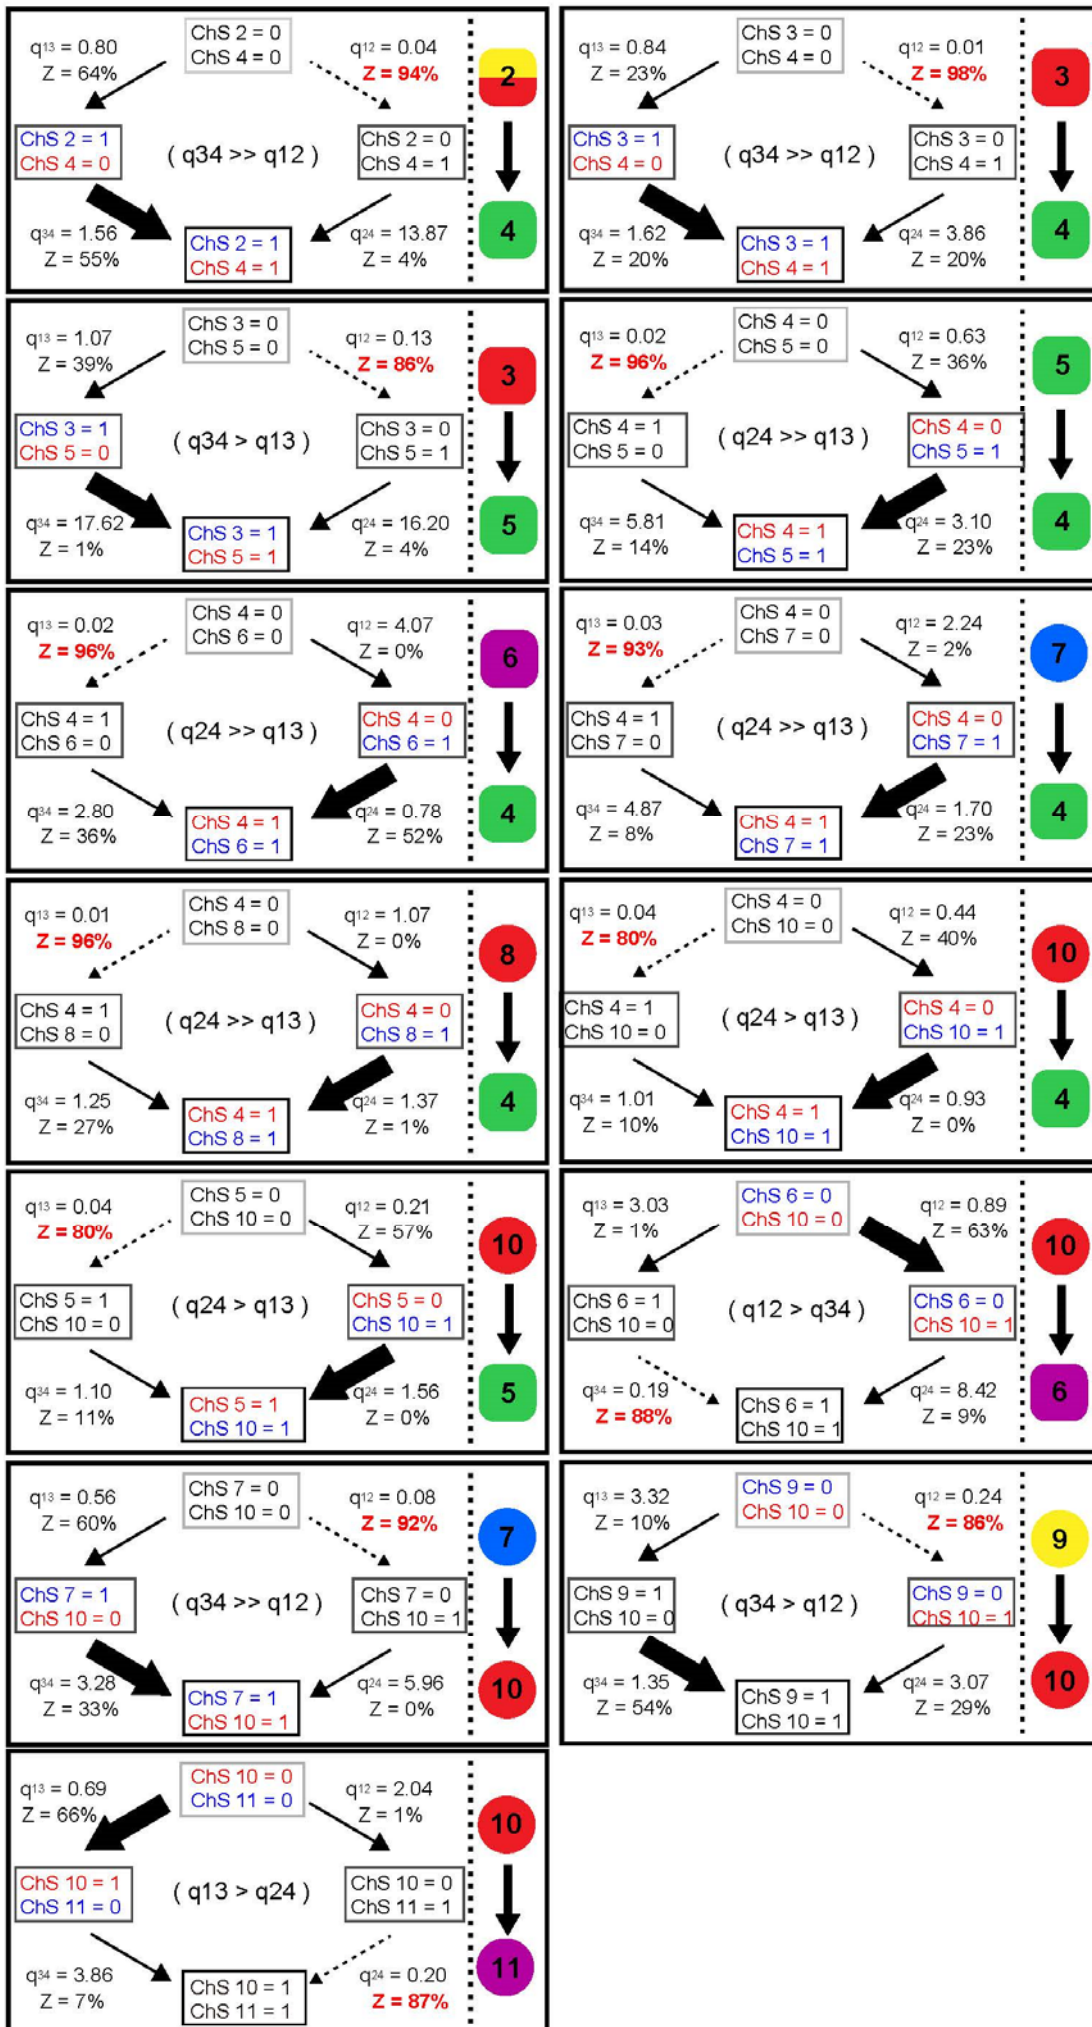

### **Supplementary Figure S4. Contingent order detected as a bias of the transition rate**

**using the Z-score.** Contingency was analysed by comparing specific sets of transition parameters and the corresponding Z-scores (i.e. q12 vs. q34; q13 vs. q24). Transitions with a lower probability of occurrence are shown by dashed arrows (Z-score >70%); the corresponding transitions with a higher probability of evolving are indicated by thick arrows. Thus, thick arrows highlight the contingent dependency of changes between some pairs of character states (ChS). In each panel, one character state change (red) is contingent upon the other character state change (blue). If a character state indicated in blue has a value of '1', that state change precedes the corresponding character state change depicted in red. On the other hand, if a character state indicated in blue has a value of '0', that state change follows the corresponding character state change depicted in red. Contingencies between pairs of character state changes are shown in the right panel of each box and are summarized as a network in Figure 4c.

**Supplementary Table S1. Sampling density of species in this study. The description of genera and the number of species was obtained from the database of the Nymphalid systematics group (<http://nymphalidae.utu.fi/index.htm>).**

| Higher taxon | Genus                   | Number of species described | Number of species used in this study |
|--------------|-------------------------|-----------------------------|--------------------------------------|
| Kallimini    | <i>Kallima</i>          | 7                           | 2                                    |
| Kallimini    | <i>Mallika</i>          | 1                           | X                                    |
| Kallimini    | <i>Catacroptera</i>     | 1                           | 1                                    |
| Kallimini    | <i>Doleschallia</i>     | 9                           | 1                                    |
| Junoniini    | <i>Protogoniomorpha</i> | 2                           | 2                                    |
| Junoniini    | <i>Yoma</i>             | 2                           | 2                                    |
| Junoniini    | <i>Salamis</i>          | 3                           | 2                                    |
| Junoniini    | <i>Junonia</i>          | 35                          | 11                                   |
| Junoniini    | <i>Precis</i>           | 15                          | 4                                    |
| Junoniini    | <i>Hypolimnas</i>       | 26                          | 1                                    |
| Nymphalini   | <i>Polygonia</i>        | 16                          | 2                                    |
| Nymphalini   | <i>Nymphalis</i>        | 5                           | 2                                    |
| Nymphalini   | <i>Aglais</i>           | 5                           | 2                                    |
| Nymphalini   | <i>Vanessa</i>          | 18                          | 3                                    |
| Nymphalini   | <i>Antanartia</i>       | 5                           | 1                                    |
| Nymphalini   | <i>Hypanartia</i>       | 14                          | 3                                    |
| Nymphalini   | <i>Mynes</i>            | 10                          | 1                                    |
| Nymphalini   | <i>Araschnia</i>        | 8                           | 1                                    |
| Nymphalini   | <i>Symbrenthia</i>      | 15                          | 2                                    |
| Nymphalini   | <i>Smyrna</i>           | 2                           | X                                    |
| Nymphalini   | <i>Tigridia</i>         | 1                           | X                                    |
| Nymphalini   | <i>Colobura</i>         | 2                           | X                                    |

**Supplementary Table S3. Species and Genbank accession numbers of the nine genes used. For images of voucher specimens, see the NSG's DNA sequences database <http://nymphalidae.utu.fi/db.php>**

| Higher taxon  | Species                           | <i>cox-I</i> | <i>ef-1a</i> | <i>wingless</i> | <i>RpS5</i> | <i>GAPDH</i> | <i>ArgKin</i> | <i>CAD</i> | <i>IDH</i> | <i>MDH</i> |
|---------------|-----------------------------------|--------------|--------------|-----------------|-------------|--------------|---------------|------------|------------|------------|
| Limenitidinae | <i>Adelpha bredowii</i>           | AY788591     | AY788693     | AY788457        | -           | -            | -             | -          | -          | -          |
| Heliconinae   | <i>Heliconius hecale</i>          | AY090202     | AY090168     | AY090135        | EU141415    | EU141514     | EU141281      | EU141337   | EU141574   | EU141638   |
| Apaturinae    | <i>Apatura iris</i>               | AY090199     | AY090165     | AY090132        | EU141413    | EU141513     | EU141280      | EU141335   | EU141572   | EU141636   |
| Apaturinae    | <i>Asterocampa idyja</i>          | GQ864738     | GQ864426     | GQ864426        | GQ865397    | GQ864930     | GQ864518      | GQ864613   | GQ865067   | GQ865175   |
| Biblidinae    | <i>Eurytela dryope</i>            | AY218242     | AY218262     | AY218280        | GQ865441    | GQ864971     | -             | GQ864654   | GQ865099   | GQ865215   |
| Biblidinae    | <i>Hamadryas februa</i>           | AY090216     | AY090182     | AY090149        | EU141402    | -            | EU141271      | EU141324   | EU141561   | EU141625   |
| Nymphalini    | <i>Araschnia levana</i>           | AY248780     | GQ864829     | GQ864423        | GQ865391    | GQ864925     | GQ864516      | GQ864610   | GQ865064   | GQ865171   |
| Nymphalini    | <i>Mynes geoffroyi</i>            | AY248778     | AY248803     | AF412760        | EU141405    | EU141505     | EU141273      | EU141327   | EU141564   | EU141628   |
| Nymphalini    | <i>Symbrenthia hypselis</i>       | AY788680     | AY788818     | AY788578        | -           | -            | -             | -          | -          | -          |
| Nymphalini    | <i>Symbrenthia tilaea</i>         | AY788679     | AY788817     | AY788577        | GQ865497    | GQ865034     | GQ864582      | GQ864713   | GQ865150   | GQ865266   |
| Nymphalini    | <i>Hypanartia lethe</i>           | AF187774     | AY788760     | AY788520        | HQ735056    | HQ734980     | HQ734859      | HQ734880   | HQ735001   | HQ735022   |
| Nymphalini    | <i>Hypanartia dione</i>           | HQ734933     | HQ734953     | HQ734843        | HQ735060    | HQ734984     | HQ734862      | HQ734884   | HQ735004   | HQ735026   |
| Nymphalini    | <i>Hypanartia kefersteini</i>     | AY788640     | AY788759     | AY788519        | HQ735061    | HQ734985     | HQ734863      | HQ734885   | HQ735005   | HQ735027   |
| Nymphalini    | <i>Vanessa cardui</i>             | HQ734922     | HQ734936     | HQ734838        | HQ735047    | HQ734971     | HQ734851      | HQ734873   | HQ734993   | HQ735015   |
| Nymphalini    | <i>Vanessa atalanta</i>           | HQ734919     | AY090187     | AF412772        | GQ865508    | GQ865045     | GQ864589      | GQ864722   | GQ865155   | GQ865275   |
| Nymphalini    | <i>Vanessa indica</i>             | HQ734916     | AY788825     | AY788585        | HQ735045    | HQ734969     | HQ734849      | HQ734871   | HQ734991   | HQ735013   |
| Nymphalini    | <i>Antanartia delius</i>          | AY788610     | AY788712     | AY788473        | GQ865387    | GQ864922     | GQ864513      | GQ864606   | GQ865062   | GQ865167   |
| Nymphalini    | <i>Aglais io</i>                  | AY248785     | AY248810     | AF412766        | FJ639576    | FJ639521     | -             | -          | -          | -          |
| Nymphalini    | <i>Aglais urticae</i>             | AY248786     | AY248811     | AF412777        | FJ639577    | FJ639522     | GQ864509      | GQ864599   | GQ865055   | GQ865161   |
| Nymphalini    | <i>Kaniska canace</i>             | FJ639397     | FJ639493     | AY248833        | FJ639584    | FJ639529     | -             | -          | -          | -          |
| Nymphalini    | <i>Nymphalis vau-album</i>        | AY248791     | AY248816     | AY248832        | FJ639581    | FJ639526     | -             | -          | -          | -          |
| Nymphalini    | <i>Polygona c-album</i>           | JN093202     | AY090188     | AY090154        | FJ639569    | FJ639514     | -             | HQ734879   | HQ735006   | HQ735028   |
| Nymphalini    | <i>Polygona c-aureum</i>          | FJ639403     | AY248824     | FJ639347        | FJ639568    | FJ639513     | GQ864575      | GQ864701   | GQ865140   | GQ865257   |
| Junoniini     | <i>Hypolimnas bolina</i>          | AY090224     | AY090190     | AY090156        | -           | -            | -             | -          | -          | -          |
| Junoniini     | <i>Precis andremiaja</i>          | AY788664     | AY788802     | AY788562        | -           | -            | -             | -          | -          | -          |
| Junoniini     | <i>Precis ceryne</i>              | AY788667     | AY788805     | AY788565        | -           | -            | -             | -          | -          | -          |
| Junoniini     | <i>Precis archesia</i>            | AY788666     | AY788804     | AY788564        | -           | -            | -             | -          | -          | -          |
| Junoniini     | <i>Precis octavia</i>             | AY788669     | AY788807     | AY788567        | -           | -            | -             | -          | -          | -          |
| Junoniini     | <i>Junonia westermanni</i>        | EU053319     | EU053356     | EU053393        | -           | -            | -             | -          | -          | -          |
| Junoniini     | <i>Junonia hierta</i>             | EU053305     | EU053344     | EU053381        | -           | -            | -             | -          | -          | -          |
| Junoniini     | <i>Junonia orithya</i>            | EU053315     | EU053351     | EU053389        | -           | -            | -             | -          | -          | -          |
| Junoniini     | <i>Junonia coenia</i>             | AY788643     | AY248801     | AY248826        | -           | -            | -             | -          | -          | -          |
| Junoniini     | <i>Junonia lemonias</i>           | EU053309     | EU053346     | EU053383        | -           | -            | -             | -          | -          | -          |
| Junoniini     | <i>Junonia alamana</i>            | EU053289     | EU053323     | EU053360        | -           | -            | -             | -          | -          | -          |
| Junoniini     | <i>Junonia atlites</i>            | EU053294     | EU053330     | EU053366        | -           | -            | -             | -          | -          | -          |
| Junoniini     | <i>Junonia iphita</i>             | AY090225     | AY090191     | AY090157        | -           | -            | -             | -          | -          | -          |
| Junoniini     | <i>Junonia erigone</i>            | AY788644     | AY788763     | AY788523        | -           | -            | -             | -          | -          | -          |
| Junoniini     | <i>Junonia hedonia</i>            | EU053303     | EU053340     | EU053377        | -           | -            | -             | -          | -          | -          |
| Junoniini     | <i>Junonia ansorgei</i>           | EU053290     | EU053326     | EU053363        | -           | -            | -             | -          | -          | -          |
| Junoniini     | <i>Salamis anteva</i>             | AY788675     | AY788813     | AY788573        | -           | -            | -             | -          | -          | -          |
| Junoniini     | <i>Salamis cacta</i>              | AY788676     | AY788814     | AY788574        | -           | -            | -             | -          | -          | -          |
| Junoniini     | <i>Protogoniomorpha anacardii</i> | AY090223     | AY090189     | AY090155        | -           | -            | -             | -          | -          | -          |
| Junoniini     | <i>Protogoniomorpha parhassus</i> | AY788673     | AY788811     | AY788571        | -           | -            | -             | -          | -          | -          |
| Junoniini     | <i>Yoma algina</i>                | AY788692     | AY788830     | AY788590        | -           | -            | -             | -          | -          | -          |
| Junoniini     | <i>Yoma sabina</i>                | EU053399     | EU053397     | EU053398        | -           | -            | -             | -          | -          | -          |
| Melitaeini    | <i>Chlosyne janais</i>            | AY788620     | AY788730     | AY788491        | GQ865414    | GQ864943     | GQ864533      | GQ864629   | -          | GQ865190   |
| Melitaeini    | <i>Phyciodes cocyta</i>           | AY156607     | AY090192     | AY090158        | GQ865486    | -            | GQ864571      | GQ864697   | -          | GQ865253   |
| Melitaeini    | <i>Melitaea cinxia</i>            | AY788656     | AY788776     | AY788536        | EU141420    | EU141518     | EU141284      | EU141342   | EU141579   | EU141643   |
| Melitaeini    | <i>Euphydryas phaeton</i>         | AF187797     | AY788747     | AY788508        | GQ865434    | GQ864965     | GQ864546      | GQ864647   | -          | GQ865208   |
| Kallimini     | <i>Doleschallia bisaltide</i>     | AY788621     | AY788735     | AY788496        | GQ865423    | GQ864955     | GQ864539      | -          | GQ865086   | GQ865199   |
| Kallimini     | <i>Catacroptera cloanthe</i>      | AY788619     | AY788724     | AY788485        | GQ865409    | GQ864939     | GQ864528      | GQ864625   | -          | GQ865186   |
| Kallimini     | <i>Kallima paralekta</i>          | AY090229     | AY090197     | AY090163        | EU141404    | EU141504     | EU141272      | EU141326   | EU141563   | EU141627   |
| Kallimini     | <i>Kallima inachus</i>            | AY788650     | AY788769     | AY788529        | -           | -            | -             | -          | -          | -          |



**Supplementary Table S4. The character states of Nymphalinae ventral-sided forewing patterns based on the Nymphalid ground plan used in this study**

|                                   | character 1             | character 2             | character 3                                     | character 4              | character 5                       | character 6               |
|-----------------------------------|-------------------------|-------------------------|-------------------------------------------------|--------------------------|-----------------------------------|---------------------------|
|                                   | Parallelism of DS & B   | Attachment of DS & Cp   | A single broken straight line of Cd             | Bending direction of BOp | Straightness of upper side of BOp | Vestigiality of ESs       |
| <i>Adelpha bredowii</i>           | parallel                | not attached            | not a single broken line                        | bending proximally       | not straight                      | vestigial                 |
| <i>Heliconius hecale</i>          | parallel                | not attached            | not a single broken line                        | bending proximally       | not straight                      | vestigial                 |
| <i>Apatura iris</i>               | parallel                | not attached            | not a single broken line                        | bending proximally       | not straight                      | not vestigial             |
| <i>Asterocampa idyja</i>          | parallel                | not attached            | not a single broken line                        | bending proximally       | not straight                      | not vestigial             |
| <i>Eurytela dryope</i>            | parallel                | not attached            | not a single broken line                        | bending proximally       | not straight                      | vestigial                 |
| <i>Hamadryas februa</i>           | parallel                | not attached            | not a single broken line                        | bending proximally       | not straight                      | not vestigial             |
| <i>Araschnia levana</i>           | parallel                | not attached            | not a single broken line                        | bending proximally       | not straight                      | not vestigial             |
| <i>Mynes geoffroyi</i>            | not parallel / parallel | not attached            | not a single broken line                        | bending proximally       | not straight                      | vestigial                 |
| <i>Symbrenthia hypselis</i>       | parallel                | not attached            | not a single broken line                        | bending proximally       | not straight                      | not vestigial             |
| <i>Symbrenthia lilaea</i>         | parallel                | not attached            | not a single broken line                        | bending proximally       | not straight                      | not vestigial             |
| <i>Hypanartia lethe</i>           | parallel                | not attached            | not a single broken line                        | bending proximally       | not straight                      | vestigial                 |
| <i>Hypanartia dione</i>           | parallel                | not attached            | not a single broken line                        | bending proximally       | not straight                      | not vestigial             |
| <i>Hypanartia kefersteini</i>     | parallel                | not attached            | not a single broken line                        | bending proximally       | not straight                      | not vestigial             |
| <i>Vanessa cardui</i>             | parallel                | not attached            | not a single broken line                        | bending proximally       | not straight                      | not vestigial             |
| <i>Vanessa atalanta</i>           | parallel                | not attached            | not a single broken line                        | bending proximally       | not straight                      | not vestigial             |
| <i>Vanessa indica</i>             | parallel                | not attached            | not a single broken line                        | bending proximally       | not straight                      | not vestigial             |
| <i>Antanartia delius</i>          | parallel                | attached                | not a single broken line                        | bending proximally       | not straight                      | not vestigial             |
| <i>Aglais io</i>                  | parallel                | not attached            | not a single broken line                        | bending proximally       | not straight                      | vestigial                 |
| <i>Aglais urticae</i>             | parallel                | attached                | not a single broken line                        | bending proximally       | not straight                      | vestigial                 |
| <i>Kaniska canace</i>             | not parallel            | not attached            | not a single broken line                        | bending proximally       | not straight                      | vestigial                 |
| <i>Nymphalis vau-album</i>        | not parallel            | not attached            | not a single broken line                        | bending proximally       | not straight                      | vestigial                 |
| <i>Polygonia c-album</i>          | not parallel            | attached                | not a single broken line / a single broken line | bending proximally       | not straight                      | vestigial                 |
| <i>Polygonia c-aureum</i>         | not parallel            | attached                | not a single broken line                        | bending proximally       | not straight                      | vestigial                 |
| <i>Hypolimnas bolina</i>          | parallel                | not attached            | not a single broken line                        | bending proximally       | not straight                      | not vestigial             |
| <i>Precis andremiaja</i>          | parallel                | not attached            | not a single broken line                        | bending proximally       | not straight                      | not vestigial             |
| <i>Precis ceryne</i>              | not parallel / parallel | not attached            | not a single broken line                        | bending proximally       | not straight / straight           | not vestigial             |
| <i>Precis archesia</i>            | parallel                | not attached / attached | a single broken line                            | bending proximally       | straight                          | not vestigial             |
| <i>Precis octavia</i>             | parallel                | not attached / attached | not a single broken line                        | bending proximally       | not straight / straight           | not vestigial             |
| <i>Junonia westermanni</i>        | parallel                | not attached            | not a single broken line                        | bending proximally       | not straight                      | vestigial                 |
| <i>Junonia hierta</i>             | parallel                | not attached            | not a single broken line                        | bending proximally       | not straight                      | not vestigial             |
| <i>Junonia orithya</i>            | parallel                | not attached            | not a single broken line                        | bending proximally       | not straight                      | not vestigial             |
| <i>Junonia coenia</i>             | parallel                | not attached            | a single broken line                            | bending proximally       | not straight                      | not vestigial             |
| <i>Junonia lemonias</i>           | parallel                | attached                | not a single broken line                        | bending proximally       | not straight                      | not vestigial             |
| <i>Junonia alamana</i>            | parallel                | not attached            | not a single broken line / a single broken line | bending proximally       | not straight / straight           | not vestigial / vestigial |
| <i>Junonia atlites</i>            | parallel                | attached                | not a single broken line                        | bending proximally       | not straight                      | not vestigial             |
| <i>Junonia iphita</i>             | parallel                | attached                | not a single broken line                        | bending proximally       | not straight                      | not vestigial             |
| <i>Junonia erigone</i>            | parallel                | attached                | not a single broken line                        | bending proximally       | not straight                      | not vestigial             |
| <i>Junonia hedonia</i>            | parallel                | attached                | not a single broken line                        | bending proximally       | not straight                      | not vestigial             |
| <i>Junonia ansorgei</i>           | parallel                | not attached            | not a single broken line                        | bending proximally       | not straight                      | not vestigial             |
| <i>Salamis anteva</i>             | parallel                | not attached            | not a single broken line                        | bending proximally       | not straight                      | vestigial                 |
| <i>Salamis cacta</i>              | parallel                | not attached            | not a single broken line                        | bending proximally       | not straight                      | vestigial                 |
| <i>Protogoniomorpha anacardii</i> | parallel                | not attached            | not a single broken line                        | bending proximally       | not straight                      | vestigial                 |
| <i>Protogoniomorpha parhassus</i> | parallel                | not attached            | not a single broken line                        | bending proximally       | not straight                      | not vestigial             |
| <i>Yoma algina</i>                | parallel                | not attached            | not a single broken line                        | bending proximally       | not straight / straight           | not vestigial             |
| <i>Yoma sabina</i>                | parallel                | not attached            | not a single broken line / a single broken line | bending proximally       | not straight / straight           | vestigial                 |
| <i>Chlosyne janais</i>            | parallel                | not attached            | not a single broken line                        | bending proximally       | not straight                      | not vestigial             |
| <i>Phyciodes cocyta</i>           | parallel                | not attached            | not a single broken line                        | bending proximally       | not straight                      | not vestigial             |
| <i>Melitaea cinxia</i>            | parallel                | not attached            | not a single broken line                        | bending proximally       | not straight                      | vestigial                 |
| <i>Euphydryas phaeton</i>         | parallel                | not attached            | not a single broken line                        | bending proximally       | not straight                      | vestigial                 |
| <i>Doleschallia bisaltide</i>     | parallel                | not attached            | a single broken line                            | bending proximally       | straight                          | vestigial                 |
| <i>Catacroptera cloanthe</i>      | parallel                | not attached            | a single broken line                            | bending proximally       | not straight                      | not vestigial             |
| <i>Kallima paralekta</i>          | parallel                | attached                | a single broken line                            | bending distally         | straight                          | vestigial                 |
| <i>Kallima inachus</i>            | parallel                | attached                | a single broken line                            | bending distally         | straight                          | vestigial                 |

**Supplementary Table S5. The character states of Nymphalinae ventral-sided hindwing patterns based on the Nymphalid ground plan used in this study**

|                                   | character 7               | character 8                       | character 9               | character 10            | character 11              |
|-----------------------------------|---------------------------|-----------------------------------|---------------------------|-------------------------|---------------------------|
|                                   | Vestigiality of B         | Fragmentation of Cp               | Vestigiality of DS        | Straightness of Cd      | Vestigiality of ESs       |
| <i>Adelpha bredowii</i>           | not vestigial             | not fragmentation                 | not vestigial             | not straight            | vestigial                 |
| <i>Heliconius hecale</i>          | vestigial                 | not fragmentation                 | vestigial                 | not straight            | vestigial                 |
| <i>Apatura iris</i>               | vestigial                 | not fragmentation                 | vestigial                 | not straight            | not vestigial             |
| <i>Asterocampa idyja</i>          | not vestigial             | not fragmentation                 | not vestigial             | not straight            | not vestigial             |
| <i>Eurytela dryope</i>            | not vestigial / vestigial | not fragmentation                 | not vestigial / vestigial | not straight            | not vestigial / vestigial |
| <i>Hamadryas februa</i>           | vestigial                 | not fragmentation                 | not vestigial             | not straight            | not vestigial             |
| <i>Araschnia levana</i>           | not vestigial             | not fragmentation                 | vestigial                 | not straight            | not vestigial             |
| <i>Mynes geoffroyi</i>            | vestigial                 | not fragmentation                 | vestigial                 | not straight            | vestigial                 |
| <i>Symbrenthia hypselis</i>       | not vestigial             | fragmentation                     | vestigial                 | not straight            | not vestigial             |
| <i>Symbrenthia lilaea</i>         | not vestigial             | fragmentation                     | vestigial                 | not straight            | not vestigial             |
| <i>Hypanartia lethe</i>           | not vestigial             | not fragmentation                 | not vestigial             | not straight            | not vestigial             |
| <i>Hypanartia dione</i>           | not vestigial             | fragmentation                     | not vestigial             | not straight            | not vestigial             |
| <i>Hypanartia kefersteini</i>     | not vestigial             | not fragmentation                 | not vestigial             | not straight            | not vestigial             |
| <i>Vanessa cardui</i>             | not vestigial             | not fragmentation                 | not vestigial             | not straight            | not vestigial             |
| <i>Vanessa atalanta</i>           | not vestigial             | not fragmentation                 | not vestigial             | not straight            | not vestigial             |
| <i>Vanessa indica</i>             | not vestigial             | not fragmentation                 | not vestigial             | not straight            | not vestigial             |
| <i>Antanartia delius</i>          | not vestigial             | not fragmentation                 | not vestigial             | not straight            | not vestigial             |
| <i>Aglais io</i>                  | not vestigial             | not fragmentation                 | not vestigial             | not straight            | vestigial                 |
| <i>Aglais urticae</i>             | not vestigial             | not fragmentation                 | not vestigial             | not straight            | vestigial                 |
| <i>Kaniska canace</i>             | not vestigial             | not fragmentation                 | not vestigial             | not straight            | vestigial                 |
| <i>Nymphalis vau-album</i>        | not vestigial             | not fragmentation                 | not vestigial             | not straight            | vestigial                 |
| <i>Polygonia c-album</i>          | not vestigial             | not fragmentation                 | not vestigial             | not straight            | vestigial                 |
| <i>Polygonia c-aureum</i>         | not vestigial             | not fragmentation                 | not vestigial             | not straight            | vestigial                 |
| <i>Hypolimnas bolina</i>          | vestigial                 | not fragmentation                 | vestigial                 | not straight / straight | not vestigial / vestigial |
| <i>Precis andremiaja</i>          | not vestigial             | not fragmentation                 | not vestigial             | not straight            | not vestigial             |
| <i>Precis ceryne</i>              | not vestigial / vestigial | not fragmentation                 | not vestigial             | straight                | not vestigial             |
| <i>Precis archesia</i>            | not vestigial / vestigial | not fragmentation                 | not vestigial / vestigial | straight                | not vestigial / vestigial |
| <i>Precis octavia</i>             | not vestigial             | not fragmentation                 | not vestigial / vestigial | not straight            | not vestigial / vestigial |
| <i>Junonia westermanni</i>        | not vestigial             | not fragmentation                 | not vestigial / vestigial | not straight            | not vestigial             |
| <i>Junonia hierta</i>             | not vestigial             | not fragmentation                 | vestigial                 | not straight            | vestigial                 |
| <i>Junonia orithya</i>            | not vestigial             | not fragmentation                 | not vestigial             | not straight            | not vestigial / vestigial |
| <i>Junonia coenia</i>             | not vestigial / vestigial | fragmentation                     | not vestigial / vestigial | not straight            | not vestigial / vestigial |
| <i>Junonia lemonias</i>           | not vestigial             | not fragmentation                 | not vestigial             | not straight            | not vestigial / vestigial |
| <i>Junonia alamana</i>            | not vestigial / vestigial | not fragmentation                 | not vestigial / vestigial | straight                | not vestigial / vestigial |
| <i>Junonia atlites</i>            | not vestigial             | fragmentation                     | not vestigial             | not straight            | not vestigial             |
| <i>Junonia iphita</i>             | not vestigial             | not fragmentation                 | not vestigial             | not straight            | not vestigial             |
| <i>Junonia erigone</i>            | not vestigial             | not fragmentation                 | not vestigial             | not straight            | not vestigial             |
| <i>Junonia hedonia</i>            | not vestigial             | not fragmentation                 | not vestigial / vestigial | not straight            | not vestigial             |
| <i>Junonia ansorgei</i>           | vestigial                 | not fragmentation                 | vestigial                 | straight                | not vestigial             |
| <i>Salamis anteva</i>             | not vestigial             | not fragmentation                 | vestigial                 | not straight            | vestigial                 |
| <i>Salamis cacta</i>              | not vestigial             | not fragmentation                 | vestigial                 | not straight            | vestigial                 |
| <i>Protogoniomorpha anacardii</i> | not vestigial             | not fragmentation                 | vestigial                 | straight                | not vestigial             |
| <i>Protogoniomorpha parhassus</i> | not vestigial             | not fragmentation                 | vestigial                 | straight                | not vestigial             |
| <i>Yoma algina</i>                | vestigial                 | not fragmentation                 | vestigial                 | straight                | not vestigial / vestigial |
| <i>Yoma sabina</i>                | not vestigial             | not fragmentation                 | vestigial                 | straight                | vestigial                 |
| <i>Chlosyne janais</i>            | not vestigial             | fragmentation                     | not vestigial             | not straight            | not vestigial             |
| <i>Phyciodes cocyta</i>           | not vestigial             | not fragmentation                 | vestigial                 | not straight            | not vestigial             |
| <i>Melitaea cinxia</i>            | not vestigial             | not fragmentation                 | not vestigial             | not straight            | not vestigial             |
| <i>Euphydryas phaeton</i>         | not vestigial             | not fragmentation                 | not vestigial             | not straight            | vestigial                 |
| <i>Doleschallia bisaltide</i>     | not vestigial             | not fragmentation                 | vestigial                 | straight                | not vestigial             |
| <i>Catacroptera cloanthe</i>      | vestigial                 | not fragmentation / fragmentation | vestigial                 | straight                | not vestigial             |
| <i>Kallima paralekta</i>          | vestigial                 | fragmentation                     | vestigial                 | straight                | vestigial                 |
| <i>Kallima inachus</i>            | vestigial                 | fragmentation                     | vestigial                 | straight                | vestigial                 |

**Supplementary Table S6. Statistics for dependent (D) and independent (I) evolution between pairs of 11 characters (Ch).** \*1 The median value of at least three replicates is shown. \*2 Logarithmic Bayes Factors (log-BF) >2 are considered as positive evidence that two models differ. \* Values that indicate the presence of differences between models are followed by an asterisk.

|       |       | log harmonic mean (D) *1 | log harmonic mean (I) *1 | log-BF *2 |
|-------|-------|--------------------------|--------------------------|-----------|
| Ch 1  | Ch 2  | -32.66                   | -34.99                   | 4.67*     |
| Ch 1  | Ch 3  | -30.20                   | -30.13                   | -0.15     |
| Ch 1  | Ch 4  | -14.64                   | -14.55                   | -0.19     |
| Ch 1  | Ch 5  | -25.49                   | -25.36                   | -0.27     |
| Ch 1  | Ch 6  | -40.81                   | -44.07                   | 6.52*     |
| Ch 1  | Ch 7  | -38.77                   | -38.38                   | -0.78     |
| Ch 1  | Ch 8  | -33.37                   | -33.19                   | -0.36     |
| Ch 1  | Ch 9  | -41.01                   | -41.53                   | 1.05      |
| Ch 1  | Ch 10 | -30.21                   | -29.51                   | -1.40     |
| Ch 1  | Ch 11 | -34.90                   | -36.83                   | 3.86*     |
| Ch 2  | Ch 3  | -44.71                   | -44.66                   | -0.11     |
| Ch 2  | Ch 4  | -29.91                   | -32.15                   | 4.48*     |
| Ch 2  | Ch 5  | -41.27                   | -41.08                   | -0.37     |
| Ch 2  | Ch 6  | -56.42                   | -55.93                   | -0.98     |
| Ch 2  | Ch 7  | -50.98                   | -50.40                   | -1.15     |
| Ch 2  | Ch 8  | -48.53                   | -48.58                   | 0.10      |
| Ch 2  | Ch 9  | -56.71                   | -56.13                   | -1.16     |
| Ch 2  | Ch 10 | -50.40                   | -50.02                   | -0.76     |
| Ch 2  | Ch 11 | -51.80                   | -51.72                   | -0.16     |
| Ch 3  | Ch 4  | -26.14                   | -27.89                   | 3.50*     |
| Ch 3  | Ch 5  | -32.43                   | -36.64                   | 8.43*     |
| Ch 3  | Ch 6  | -52.52                   | -52.43                   | -0.18     |
| Ch 3  | Ch 7  | -48.22                   | -48.47                   | 0.50      |
| Ch 3  | Ch 8  | -44.99                   | -44.11                   | -1.76     |
| Ch 3  | Ch 9  | -52.40                   | -52.72                   | 0.65      |
| Ch 3  | Ch 10 | -39.97                   | -43.51                   | 7.07*     |
| Ch 3  | Ch 11 | -47.40                   | -47.71                   | 0.60      |
| Ch 4  | Ch 5  | -21.57                   | -23.89                   | 4.62*     |
| Ch 4  | Ch 6  | -38.66                   | -40.09                   | 2.85*     |
| Ch 4  | Ch 7  | -35.29                   | -36.87                   | 3.15*     |
| Ch 4  | Ch 8  | -30.16                   | -31.77                   | 3.24*     |
| Ch 4  | Ch 9  | -39.97                   | -40.61                   | 1.28      |
| Ch 4  | Ch 10 | -31.24                   | -32.53                   | 2.58*     |
| Ch 4  | Ch 11 | -34.27                   | -35.10                   | 1.66      |
| Ch 5  | Ch 6  | -49.42                   | -48.99                   | -0.86     |
| Ch 5  | Ch 7  | -44.93                   | -44.91                   | -0.05     |
| Ch 5  | Ch 8  | -40.81                   | -40.77                   | -0.08     |
| Ch 5  | Ch 9  | -49.30                   | -48.88                   | -0.84     |
| Ch 5  | Ch 10 | -33.09                   | -39.58                   | 12.98*    |
| Ch 5  | Ch 11 | -44.21                   | -44.63                   | 0.84      |
| Ch 6  | Ch 7  | -59.74                   | -59.60                   | -0.29     |
| Ch 6  | Ch 8  | -55.59                   | -55.46                   | -0.27     |
| Ch 6  | Ch 9  | -63.34                   | -63.45                   | 0.23      |
| Ch 6  | Ch 10 | -56.30                   | -57.86                   | 3.12*     |
| Ch 6  | Ch 11 | -51.91                   | -60.16                   | 16.50*    |
| Ch 7  | Ch 8  | -52.51                   | -52.10                   | -0.82     |
| Ch 7  | Ch 9  | -59.15                   | -61.29                   | 4.29*     |
| Ch 7  | Ch 10 | -46.00                   | -49.97                   | 7.93*     |
| Ch 7  | Ch 11 | -56.52                   | -55.85                   | -1.33     |
| Ch 8  | Ch 9  | -57.80                   | -57.53                   | -1.43     |
| Ch 8  | Ch 10 | -46.42                   | -46.16                   | -0.51     |
| Ch 8  | Ch 11 | -51.87                   | -51.85                   | -0.04     |
| Ch 9  | Ch 10 | -54.26                   | -57.55                   | 6.57*     |
| Ch 9  | Ch 11 | -60.97                   | -61.45                   | 0.96      |
| Ch 10 | Ch 11 | -51.26                   | -52.41                   | 2.31*     |

**Supplementary Table S7. Z-score and transition rates between pairs of 11 characters (Ch) in dependent evolution.**

|       |       |                 | q12  | q13  | q21   | q24   | q31   | q34   | q42   | q43   |
|-------|-------|-----------------|------|------|-------|-------|-------|-------|-------|-------|
| Ch 1  | Ch 2  | transition rate | 1.61 | 1.26 | 1.82  | 1.37  | 0.12  | 0.88  | 1.46  | 1.93  |
|       |       | Z-score (%)     | 6    | 14   | 3     | 9     | 62    | 0     | 4     | 3     |
| Ch 1  | Ch 6  | transition rate | 4.31 | 4.49 | 1.27  | 4.13  | 0.07  | 4.03  | 1.40  | 5.11  |
|       |       | Z-score (%)     | 8    | 9    | 56    | 12    | 83    | 0     | 6     | 5     |
| Ch 1  | Ch 11 | transition rate | 3.98 | 4.03 | 1.06  | 3.68  | 0.04  | 2.19  | 1.98  | 3.48  |
|       |       | Z-score (%)     | 8    | 12   | 59    | 12    | 89    | 0     | 2     | 17    |
| Ch 2  | Ch 4  | transition rate | 0.04 | 0.80 | 12.02 | 13.87 | 12.34 | 1.56  | 5.58  | 12.45 |
|       |       | Z-score (%)     | 94   | 64   | 8     | 4     | 0     | 55    | 39    | 2     |
| Ch 3  | Ch 4  | transition rate | 0.01 | 0.84 | 3.11  | 3.86  | 4.97  | 1.62  | 1.48  | 4.17  |
|       |       | Z-score (%)     | 98   | 23   | 34    | 20    | 12    | 20    | 63    | 22    |
| Ch 3  | Ch 5  | transition rate | 0.13 | 1.07 | 15.21 | 16.20 | 19.43 | 17.62 | 3.38  | 15.06 |
|       |       | Z-score (%)     | 86   | 39   | 7     | 4     | 1     | 1     | 56    | 2     |
| Ch 3  | Ch 10 | transition rate | 0.26 | 0.38 | 1.73  | 1.58  | 1.11  | 1.07  | 0.71  | 0.77  |
|       |       | Z-score (%)     | 37   | 3    | 0     | 0     | 9     | 8     | 27    | 17    |
| Ch 4  | Ch 5  | transition rate | 0.63 | 0.02 | 7.50  | 3.10  | 4.89  | 5.81  | 6.02  | 2.37  |
|       |       | Z-score (%)     | 36   | 96   | 6     | 23    | 26    | 14    | 18    | 56    |
| Ch 4  | Ch 6  | transition rate | 4.07 | 0.02 | 3.93  | 0.78  | 4.36  | 2.80  | 4.35  | 1.16  |
|       |       | Z-score (%)     | 0    | 96   | 19    | 52    | 21    | 36    | 11    | 72    |
| Ch 4  | Ch 7  | transition rate | 2.24 | 0.03 | 6.76  | 1.70  | 4.99  | 4.87  | 6.19  | 1.72  |
|       |       | Z-score (%)     | 2    | 93   | 1     | 23    | 8     | 8     | 3     | 54    |
| Ch 4  | Ch 8  | transition rate | 1.07 | 0.01 | 1.72  | 1.37  | 1.16  | 1.25  | 1.18  | 0.55  |
|       |       | Z-score (%)     | 0    | 96   | 16    | 1     | 40    | 27    | 37    | 66    |
| Ch 4  | Ch 10 | transition rate | 0.44 | 0.04 | 1.60  | 0.93  | 1.01  | 1.01  | 1.00  | 0.78  |
|       |       | Z-score (%)     | 40   | 80   | 2     | 0     | 10    | 10    | 13    | 27    |
| Ch 5  | Ch 10 | transition rate | 0.21 | 0.04 | 1.74  | 1.56  | 1.14  | 1.10  | 1.05  | 0.82  |
|       |       | Z-score (%)     | 57   | 80   | 0     | 0     | 8     | 11    | 14    | 26    |
| Ch 6  | Ch 10 | transition rate | 0.89 | 3.03 | 10.10 | 8.42  | 1.19  | 0.19  | 12.77 | 2.15  |
|       |       | Z-score (%)     | 63   | 1    | 0     | 9     | 74    | 88    | 1     | 33    |
| Ch 6  | Ch 11 | transition rate | 4.70 | 5.24 | 34.51 | 18.15 | 33.80 | 6.82  | 0.94  | 0.83  |
|       |       | Z-score (%)     | 5    | 0    | 3     | 8     | 3     | 30    | 82    | 82    |
| Ch 7  | Ch 9  | transition rate | 3.52 | 1.68 | 7.24  | 8.28  | 10.41 | 9.39  | 9.52  | 3.45  |
|       |       | Z-score (%)     | 11   | 26   | 1     | 1     | 2     | 4     | 2     | 22    |
| Ch 7  | Ch 10 | transition rate | 0.08 | 0.56 | 5.66  | 5.96  | 3.77  | 3.28  | 5.55  | 4.48  |
|       |       | Z-score (%)     | 92   | 60   | 2     | 0     | 20    | 33    | 7     | 4     |
| Ch 9  | Ch 10 | transition rate | 0.24 | 3.32 | 5.73  | 3.07  | 5.31  | 1.35  | 2.04  | 3.82  |
|       |       | Z-score (%)     | 86   | 10   | 1     | 29    | 1     | 54    | 30    | 5     |
| Ch 10 | Ch 11 | transition rate | 2.04 | 0.69 | 0.57  | 0.20  | 7.28  | 3.86  | 3.63  | 12.84 |
|       |       | Z-score (%)     | 1    | 66   | 81    | 87    | 0     | 7     | 17    | 3     |

**Supplementary Table S8. Contingent evolution (C) detected within dependent evolution (D)**

Dependent evolution

|       | Ch 1 |   | Ch 2 |   | Ch 3 |   | Ch 4 |   | Ch 5 |   | Ch 6 |   | Ch 7 |   | Ch 8 |   | Ch 9 |   | Ch 10 |  | Ch 11 |  |
|-------|------|---|------|---|------|---|------|---|------|---|------|---|------|---|------|---|------|---|-------|--|-------|--|
| Ch 1  |      |   |      |   |      |   |      |   |      |   |      |   |      |   |      |   |      |   |       |  |       |  |
| Ch 2  | D    |   |      |   |      |   |      |   |      |   |      |   |      |   |      |   |      |   |       |  |       |  |
| Ch 3  | —    | — |      |   |      |   |      |   |      |   |      |   |      |   |      |   |      |   |       |  |       |  |
| Ch 4  | —    | D | D    |   |      |   |      |   |      |   |      |   |      |   |      |   |      |   |       |  |       |  |
| Ch 5  | —    | — | D    | D |      |   |      |   |      |   |      |   |      |   |      |   |      |   |       |  |       |  |
| Ch 6  | D    | — | —    | D | —    |   |      |   |      |   |      |   |      |   |      |   |      |   |       |  |       |  |
| Ch 7  | —    | — | —    | D | —    | — |      |   |      |   |      |   |      |   |      |   |      |   |       |  |       |  |
| Ch 8  | —    | — | —    | D | —    | — | —    |   |      |   |      |   |      |   |      |   |      |   |       |  |       |  |
| Ch 9  | —    | — | —    | — | —    | — | —    | D | —    |   |      |   |      |   |      |   |      |   |       |  |       |  |
| Ch 10 | —    | — | D    | D | D    | D | D    | D | —    | D |      |   |      |   |      |   |      |   |       |  |       |  |
| Ch 11 | D    | — | —    | — | —    | — | —    | D | —    | — | —    | — | —    | — | —    | — | —    | — | D     |  |       |  |

Contingent evolution

|       | Ch 1 |   | Ch 2 |   | Ch 3 |   | Ch 4 |   | Ch 5 |   | Ch 6 |   | Ch 7 |   | Ch 8 |   | Ch 9 |   | Ch 10 |  | Ch 11 |  |
|-------|------|---|------|---|------|---|------|---|------|---|------|---|------|---|------|---|------|---|-------|--|-------|--|
| Ch 1  |      |   |      |   |      |   |      |   |      |   |      |   |      |   |      |   |      |   |       |  |       |  |
| Ch 2  | —    |   |      |   |      |   |      |   |      |   |      |   |      |   |      |   |      |   |       |  |       |  |
| Ch 3  | —    | — |      |   |      |   |      |   |      |   |      |   |      |   |      |   |      |   |       |  |       |  |
| Ch 4  | —    | C | C    |   |      |   |      |   |      |   |      |   |      |   |      |   |      |   |       |  |       |  |
| Ch 5  | —    | — | C    | C |      |   |      |   |      |   |      |   |      |   |      |   |      |   |       |  |       |  |
| Ch 6  | —    | — | —    | C | —    |   |      |   |      |   |      |   |      |   |      |   |      |   |       |  |       |  |
| Ch 7  | —    | — | —    | C | —    | — |      |   |      |   |      |   |      |   |      |   |      |   |       |  |       |  |
| Ch 8  | —    | — | —    | C | —    | — | —    |   |      |   |      |   |      |   |      |   |      |   |       |  |       |  |
| Ch 9  | —    | — | —    | — | —    | — | —    | — | —    | — |      |   |      |   |      |   |      |   |       |  |       |  |
| Ch 10 | —    | — | C    | C | C    | C | C    | C | —    | C |      |   |      |   |      |   |      |   |       |  |       |  |
| Ch 11 | —    | — | —    | — | —    | — | —    | — | —    | — | —    | — | —    | — | —    | — | —    | — | C     |  |       |  |
